# Supplementary material for: Low thermal conductivity of Al-doped ZnO with layered and correlated grains
Source: Royal Society of Chemistry journal article supplement (doi:10.1039/c4ra01220h), 2014-01-01
Supplement: c4ra01220h1.pdf [file c4ra01220h1.pdf]

Supporting information

## Low Thermal Conductivity of Al-doped ZnO with Layered and Correlated Grain

Yu Zhao,<sup>\*a</sup> Bo Chen,<sup>a</sup> Andrew Miner<sup>b</sup> and Shashank Priya<sup>\*a</sup>

<sup>a</sup> Bio-Inspired Materials and Devices Laboratory (BMDL), Center for Energy Harvesting Materials and Systems (CEHMS), Virginia Tech, Blacksburg, VA 24061

<sup>b</sup> Romny Scientific Inc., San Bruno, CA 94066

Corresponding author: Tel.: +1 540 231 0745 (S. Priya), +1 540 553 4717 (Y. Zhao); fax: +1 540 231 2903. E-mail addresses: spriya@vt.edu (S. Priya), zhaoyu@vt.edu (Y. Zhao)

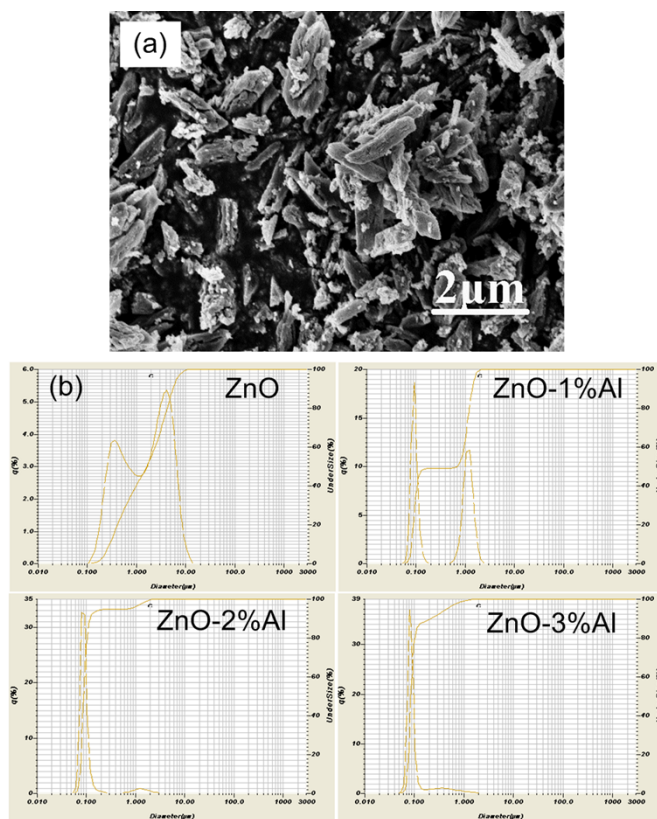

Figure. S1 (a) SEM micrographs from ZnO particles synthesized by sol-gel process; (b) Particle size distribution from ZnO-  $x\%$ Al ( $x=0, 1, 2, 3$ ) nanoparticles synthesized by sol-gel process.

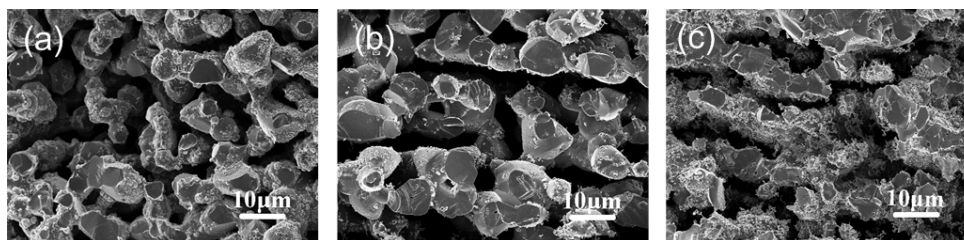

Figure. S2 Cross-sectional SEM micrographs of ZnO-Al bulk pellets after sintering under  $10^{-2}$  Torr (a) ZnO-1%Al, (b) ZnO-2%Al, (c) ZnO-3%Al.

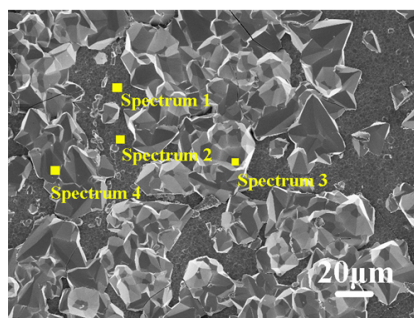

Figure. S3 SEM micrographs from inside surface of quartz tube ( $10^{-5}$  Torr,  $900^{\circ}\text{C}$ ) and corresponding elemental analysis is listed in Table 1.

Table S1 Elemental analysis from the inside surface of quartz tube ( $10^{-5}$  Torr,  $900^{\circ}\text{C}$ ) by EDS point scan. The image is shown in Figure S3.

| Location   | O (Atomic%) | Si (Atomic%) | Zn (Atomic%) |
|------------|-------------|--------------|--------------|
| Spectrum 1 | 59.69       | 15.21        | 25.10        |
| Spectrum 2 | 57.64       | 15.47        | 26.89        |
| Spectrum 3 | 58.26       | -            | 41.74        |
| Spectrum 4 | 53.24       | -            | 46.76        |

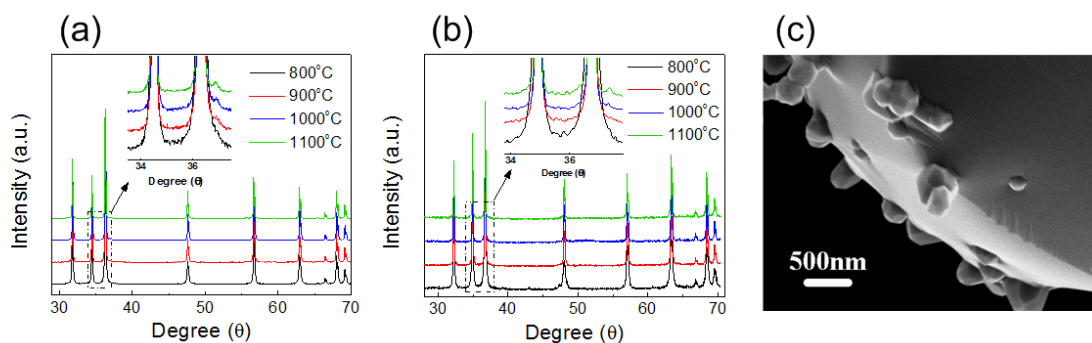

Figure. S4 XRD of ZnO-2%Al bulk pellets after sintering at 800, 900, 1000,  $1100^{\circ}\text{C}$  in (a)  $10^{-5}$  Torr, and (b) Nitrogen. The XRD data are normalized. (c) SEM micrographs of second phase nano-precipitates on the surface of ZnO grain (ZnO-2%Al bulk pellet).
